# Supplementary material for: Mammalian odorant receptor tuning breadth persists across distinct odorant panels
Source: PLoS One. 2017 Sep 25;12(9):e0185329. doi: 10.1371/journal.pone.0185329 (PMC5612731; doi:10.1371/journal.pone.0185329)
Supplement: S1 Table — (XLSX) [file pone.0185329.s001.xlsx]

## Sheet: All PC Values
CID	PC1	PC2
22310	1.90766	0.171862
121723	-3.22776	3.77752
62842	1.1811	-0.0637131
32594	1.14001	-3.1349
5325830	2.85152	-0.00130465
88288	4.33413	0.570253
62241	4.33413	0.570253
88038	5.36621	0.701441
548275	-2.44885	4.43696
27868	3.81281	3.53166
84467	3.92877	2.4765
26447	3.55474	0.667335
5368797	5.67184	3.71933
5281520	4.37254	0.531706
7439	1.76632	-0.414003
22873	3.19754	4.02368
2724896	1.35608	-0.961028
62572	-0.414515	0.109915
78236	3.11515	1.41011
62539	1.15958	-1.4446
19707	0.499064	-0.984595
18827	1.79736	0.732267
62465	-2.02222	-0.841821
17525	2.13813	2.96995
27867	2.3799	2.22702
5283324	1.3621	0.452137
5363374	-0.0210596	0.856951
6137	-5.03465	1.86066
1254	3.79096	0.924869
62378	3.12739	1.6197
14286	0.0958474	-2.89351
14257	5.89548	2.97896
5284503	1.21771	-0.718963
5281167	0.930016	-1.20186
5318042	1.03569	-0.641111
5324489	0.728704	-0.995979
13576	3.57811	2.09204
13187	2.89461	1.63642
12810	1.36584	1.77443
71567	-4.49925	1.26271
12377	3.90937	-0.396103
12338	1.71612	-0.834503
638097	1.7672	-0.288881
12206	-0.28177	0.441676
12203	3.53125	2.01915
429065	-0.532309	-0.296369
12178	1.80066	-0.715783
12101	-1.37094	-0.813303
8314	-4.32732	1.36582
11569	-0.417556	-2.00205
11527	2.73495	1.08719
11524	2.69546	0.0257511
11516	2.71784	0.543272
11507	3.78126	-0.340908
11463	3.55848	-0.782327
11233	3.72505	-0.60382
11230	2.85152	-0.00130465
11173	0.491962	-1.61644
11124	-0.905337	-0.832055
10448	0.943743	-1.00819
10430	-4.41874	1.14589
10405	3.34491	1.59549
443156	2.87314	-2.84769
1549018	2.10731	-0.259939
2758	3.37228	-0.835454
159055	1.66556	-2.51268
444294	1.66556	-2.51268
10041	2.85546	-2.74848
9609	2.30951	-1.45154
2969	-1.86703	4.98758
8697	-2.79938	3.51977
8914	3.4573	2.12512
8908	0.725504	2.01709
8900	4.12867	0.110426
8857	-0.935251	-0.852947
638011	1.98105	0.746103
444539	-5.28023	1.01329
8658	-0.37055	-2.30934
1060	-6.53778	0.0626094
31289	2.73599	1.60671
15600	5.76061	1.9781
31268	2.79532	-1.74035
31265	0.965865	1.71389
31260	1.41062	-1.09048
31253	3.04846	0.357834
31249	-0.351436	1.40193
31246	2.17456	-0.225072
31242	-1.15349	-0.64633
637759	0.668168	-1.24705
1183	-2.57509	-1.39053
3102	1.00817	-1.31377
8186	3.61214	2.71735
8184	4.28398	3.24509
8180	-1.49436	5.57178
8175	3.16948	2.26567
8174	3.87345	2.77999
8163	3.68899	2.86878
957	3.00912	1.50536
8091	1.0302	2.75433
1045	2.08864	-1.76129
8058	4.0324	-0.880068
8048	2.62912	4.15445
8038	-0.145283	0.363509
8030	2.15839	-1.94627
8025	-2.12192	-1.71227
8012	2.07018	-1.29186
8003	3.36771	-1.15517
7969	1.35565	-2.21337
7966	2.29682	-0.789354
1140	2.49004	-2.59176
642783	-0.485029	0.214233
637090	-6.07673	0.22512
7843	3.37885	-1.99715
7826	0.574807	1.96477
7824	0.082244	1.00076
2879	-1.34336	-0.978984
7803	0.361797	0.516527
7799	1.81798	2.94741
643779	1.79268	0.185618
643820	2.03407	0.613148
637566	2.28899	1.15087
101977	3.01284	1.46088
24191	0.00863849	-1.0264
7780	1.26228	2.96393
7770	0.973624	1.0356
7762	0.187468	0.250231
7749	-0.0385825	-0.25576
637563	0.919905	-1.8921
999	-4.91763	0.810486
7674	1.16202	-1.78453
7654	0.0430045	0.15
637758	-0.192897	0.101657
7463	3.30032	-1.30011
7462	3.58688	-0.222502
7460	3.58769	-0.105754
7438	2.07959	-0.118781
7362	-0.737908	-2.17547
637513	-1.36955	-0.128851
7302	-0.845509	-0.197504
7239	0.573984	-2.12512
7165	-0.434521	-0.55518
7144	-2.1483	-0.985357
7127	0.208836	-1.78276
931	2.25611	-3.56547
6997	-1.19698	-1.15728
6988	2.64267	-0.180135
6987	2.66595	-0.00516167
5354499	4.28409	-1.14624
6654	3.99644	-0.187285
6616	2.96969	-2.00357
6584	-1.25249	-1.42374
1032	-5.38804	0.304094
6556	3.24657	-1.26491
443158	2.1758	1.36655
6549	2.26195	1.31645
6386	0.615893	-2.12503
6360	2.81568	-2.48569
1068	1.8759	-1.99036
6334	2.73081	-2.22334
6322	-4.72837	2.50348
791	-4.2576	1.62201
6305	-4.42946	2.25979
1031	0.499678	-2.07946
773	-5.07466	0.742603
6140	-4.49925	1.26271
876	-5.03465	1.86066
6106	-4.58911	1.68548
5280450	0.0668229	9.01385
1153	-6.37918	2.18122
6054	1.04391	-1.67158
866	-4.61767	2.71029
753	-1.21945	-2.15988
750	-6.17314	-0.164929
548221	-2.0811	5.09641
108505	3.6717	3.15986
61771	3.29991	0.380057
20499	2.52463	-0.850124
77698	0.093954	-1.3926
11748	-2.02294	-1.27856
11747	0.150053	-1.53787
7335	1.03967	0.958333
6669	0.0667728	0.215375
19310	2.24463	-1.49462
8205	3.16206	5.86504
106826	3.16936	2.1502
236687	2.37555	0.768579
105513	2.25027	-0.389879
106734	1.76625	-2.64544
5367762	0.357165	0.636733
91604	2.98715	1.30722
62105	1.68513	-1.77419
8892	-4.18585	2.36365
3032557	1.37545	3.13429
6441026	3.92003	1.52797
93199	3.00255	1.1625
250096	0.541844	0.860571
61951	1.94782	-2.68199
92292	4.11167	1.80323
9025	0.30946	-1.97725
5283349	1.68529	1.4836
89440	3.20905	-0.408047
440967	3.6283	-0.543194
6259976	-0.959067	-0.155517
5373603	-0.644163	0.179813
27458	1.46432	-3.68348
638014	2.61267	0.129529
26331	0.827302	-4.3465
61653	2.28533	-1.08693
122510	4.04055	-0.363611
61527	0.898194	-0.717504
24915	1.71436	1.89921
5364729	-0.441846	0.372843
138859	6.03356	4.75434
5323652	-1.07319	-0.572206
80865	0.13874	0.34918
5281163	-0.19209	0.0315418
93009	0.717968	-0.575553
78484	2.4889	0.412887
20859	1.01942	-1.12016
20797	3.06582	0.231604
77153	4.57351	2.59176
103005	4.32177	0.770747
76877	3.59611	-0.703244
18467	-0.0807485	-4.57488
17617	1.87131	2.48587
227085	-1.53756	-2.89062
62444	0.116832	-0.0958972
16913	2.57433	-1.72726
62433	2.32422	2.9854
73918	3.89702	1.20705
101150	2.54663	-0.23025
14918	-1.69694	-1.19326
91497	3.98535	1.50806
13420	3.3799	-0.553126
13006	0.719175	-1.20641
12813	1.50258	3.00161
61199	-2.50117	1.26366
638098	1.79949	-0.669795
12146	0.872171	0.58737
61138	-5.28502	1.08042
11552	1.01034	-1.59268
11002	4.22047	1.38956
7894	2.37758	-1.07553
10890	1.72056	2.55783
10821	1.12198	-3.64348
10722	0.827123	-2.03887
10400	2.88152	-1.35504
10285	0.948922	-4.35848
9261	1.2679	-5.87511
9256	1.47354	-2.51548
9016	0.95232	-2.37771
8918	1.99011	3.74734
8868	-1.19909	-0.0942016
81263	2.93035	1.4112
98403	4.24715	3.44469
12201	-1.11662	0.831915
1136	0.861896	-1.19309
67285	1.38021	-3.02479
8635	-1.52731	-1.64246
230920	2.33692	-2.26153
31277	-10.7612	4.36819
31276	0.337675	1.15953
31266	0.771651	2.19981
31252	1.52041	-4.48361
8452	2.10048	-0.96399
5281531	5.53559	3.33804
8148	4.09846	1.51365
8102	2.71733	-0.189981
8082	3.27514	-1.86629
1049	1.56667	-4.45123
8078	4.77812	-1.4638
1127	3.68753	-0.936341
61016	2.15563	0.711106
7794	2.71056	1.05152
8842	3.01284	1.46088
7765	1.46545	-0.334042
7731	1.0387	-1.84024
7714	1.84969	3.65257
7710	1.04744	2.57275
7685	0.736114	0.178124
25208	0.631803	-2.0495
7600	1.55453	2.28698
1550884	2.3206	1.07123
7583	1.49395	-1.63489
7416	-1.1263	-2.10553
7363	0.557359	-2.10233
7170	-0.751623	0.206037
7119	0.751167	-2.80414
66678	2.15823	-2.46898
7044	5.30134	-0.818929
442495	2.64267	-0.180135
6982	-0.264604	-0.23846
98118	1.37051	3.73816
6920	0.517821	-1.38378
5281515	3.98597	-1.75852
6736	1.80343	-1.82907
6660	-1.64099	-0.245554
65724	2.0214	-0.815525
5371002	3.27336	1.18925
6590	-4.87508	0.650434
6569	0.863139	-1.577
6558	1.96826	-1.75959
6544	1.61351	-1.22348
6501	-0.0892834	-0.0729533
6416	1.43597	-1.43943
1146	0.97452	-2.7232
6288	-5.22278	0.725189
62336	1.52719	-0.463727
5862	-5.18866	0.486523
552003	-3.35818	4.06613
136145	5.07021	-1.87546
75809	-4.78235	1.43448
16368	-5.63435	4.3932
12587	-4.08339	2.10744
10457	-6.75107	5.21301
8182	6.52407	3.01339
8143	3.77418	1.49256
8127	3.39238	0.854397
8068	2.27717	-0.878264
8060	2.32629	-0.892237
2266	-6.60048	6.26569
385	-7.97072	5.00835
181287	2.97843	0.350019
66282	1.21967	-1.92393
5367785	2.26871	4.50677
20928	0.845592	-1.02564
137980	1.11153	-2.38037
638012	2.64267	-0.180135
16867	1.68144	-0.00904323
12748	0.771284	-2.10812
11902	-1.7577	-0.976691
10444	2.51079	-1.074
10024	1.48311	-0.45002
795	0.488557	-3.31914
9253	4.23072	-0.865903
9251	2.63962	-2.2496
22311	3.47402	-0.433952
31241	2.42744	0.373803
8164	1.60607	3.19988
7059	0.988558	-4.07536
7043	0.180352	-2.35716
6433147	2.94014	0.867321
6448	1.02625	-0.176603
5363140	1.01389	-0.629157
5362622	0.303487	1.12143
1551246	1.56034	0.829392
518700	1.95142	-2.18834
102611	1.13495	-0.944774
84682	0.853301	-1.75296
12248	0.132643	-1.88871
106829	0.920281	2.45501
12291	3.04697	-1.55179
11006	7.92187	5.53628
14896	3.72867	-0.521798
7965	3.05059	-0.868372
1001	1.72874	-1.55053
5610	-1.09523	-0.42218
3021997	2.1845	-0.713742
3034843	2.12867	-0.369935
108630	-0.0464289	0.14474
557223	0.359042	3.25776
61953	4.0074	0.579835
520108	0.117312	-2.05993
91098	1.41885	-0.846517
5370602	1.93509	0.0229103
5362620	2.11546	1.17265
443163	2.90069	0.47944
5280598	3.66476	3.96332
369312	1.94666	-0.623271
5365909	-4.81735	1.4711
27941	3.74695	0.936022
27866	3.29335	0.25464
61809	0.854895	-1.7383
5282707	-5.11397	1.77674
61523	2.35868	-0.00188181
6986	3.55715	0.667238
61416	3.52569	5.36974
5284507	3.51686	3.35949
10857465	4.60116	-0.271899
443157	2.66722	1.34072
62592	2.54147	3.44256
21648	-0.889994	-0.176492
78435	-4.78866	1.13968
1268142	3.06581	0.231128
445070	4.01626	4.00121
61346	1.4348	0.404039
61337	-1.61648	-0.213826
19844	-3.81061	-0.56137
248488	5.03208	2.74405
443159	3.55715	0.667238
75427	2.66722	1.34072
16872	1.93012	2.90368
16324	-0.0175657	0.616183
61282	1.90187	-0.243795
5367745	0.276362	0.127361
15422	3.46266	0.866244
5282708	-4.97659	1.74556
64805	0.819142	-0.875111
14489	-0.360876	0.490942
62374	1.2035	-1.53011
13367	0.696075	-2.30938
12097	-0.373029	-1.44285
11980	-1.23117	-0.259702
33637	1.10923	-2.16005
10934	1.81059	-1.45898
10364	-0.0840893	-0.00729058
62348	-2.30932	-1.31093
8797	-0.733526	-1.17622
8785	-0.400435	-0.28468
31272	-0.295177	0.606893
31244	-0.259794	-1.91893
31234	1.26786	-0.968644
31219	0.184929	-0.0454495
31211	-1.6352	-0.133934
8363	-2.1243	1.79094
61041	1.92468	-1.23901
61040	0.709619	2.19472
8159	1.15163	2.79039
5368076	0.743395	2.62035
8106	2.89195	0.0898399
8073	-1.61783	-0.623047
8007	1.88651	-1.48498
61024	2.6757	4.18455
7967	2.54005	-1.16921
7848	1.66892	-1.80083
5354883	-1.12008	-0.101236
5315892	0.535385	-1.39393
7695	-0.534926	-0.35961
5273469	0.975092	2.31017
7650	0.588499	0.636268
637520	-0.933329	-0.640878
60997	0.890587	1.0022
7559	-0.557003	-0.494194
7461	3.67696	-0.489678
7341	-3.99938	1.78548
3314	-2.28279	-0.833222
7150	-1.15977	-1.17099
637776	0.184996	-2.02633
6989	0.159179	-0.0813775
62326	-4.92302	0.978308
6425	0.633631	-3.77095
439250	3.56654	-0.499807
440917	3.56654	-0.499807
138166	2.60184	-1.45589
12352	0.727174	-0.275835
10345	0.67453	-2.08686
7392	3.21793	0.549504
7391	3.6549	1.04333
37182	-3.07535	-0.821882
30914	-0.213352	-4.35129
29574	-2.50221	-1.01771
5283316	0.920681	-0.185155
62725	1.94268	-1.33958
5363229	1.53611	0.216692
61845	0.893926	-0.964057
637511	0.0352496	-1.41564
522674	1.62977	-1.08944
24473	2.7024	0.270754
5281168	0.398039	-0.869278
439570	1.76628	-0.413993
5283329	0.752574	0.0767826
5283321	0.129565	-0.750006
16724	1.76628	-0.413993
641298	-0.458502	-1.98486
61235	3.00979	1.62679
12367	2.98286	1.54147
12348	0.145987	1.19207
12297	1.5237	-0.744327
637920	0.130608	-1.88811
11883	-3.47646	-1.49122
11813	-2.0046	-1.23491
11761	-2.84701	-1.60286
11617	1.5578	-1.07756
11583	1.60621	-0.687743
11520	2.12053	-0.219083
643731	1.00674	0.181123
10976	1.97715	0.0232646
9309	1.90198	-1.83053
5282108	2.72154	0.188371
31245	1.29686	-1.06771
8461	-2.89027	-0.842344
798	1.49273	-2.0923
8376	-4.17271	0.147827
9862	1.50053	-0.0745295
7895	0.971371	-1.25607
246728	2.62602	0.550588
7802	2.09925	0.0645954
7738	0.280532	-1.84211
7725	0.366029	-1.79056
7707	0.952049	-0.955075
60998	1.07985	1.1439
7519	0.787049	-2.1763
7473	-1.08404	-1.69747
7422	-1.39717	-1.39937
7288	1.45301	-1.15317
7284	0.828585	-2.04224
7146	0.832311	-1.51112
24585	2.71708	0.165582
6944	-0.934928	-1.50159
6826	-1.03465	-1.26302
6184	1.40974	-0.222538
58	-7.22071	0.386294
107	-4.85995	2.368
126	-2.72847	-0.336683
176	-6.61614	-0.642124
177	-1.81542	-3.73161
179	-1.36081	-2.09442
180	-0.504382	-3.41212
196	-9.27816	3.3733
205	-5.97739	1.09911
222	-1.05467	-5.82143
229	-1.39698	-0.623863
235	-5.08256	1.76404
236	-7.0671	2.12274
239	-6.37439	-0.186447
240	-0.746116	-1.85598
241	1.64189	-3.29944
242	-2.72259	-0.531809
243	-4.11353	0.332566
244	-0.47992	-1.81162
261	-0.975786	-3.38767
262	-0.744063	-2.55791
263	-0.733525	-3.53981
264	-6.17569	-0.0752045
273	0.752335	-3.13881
280	-3.54141	-3.65517
284	-7.3848	-1.88211
297	1.61487	-5.02742
307	-0.48707	-0.489122
308	-0.35488	-0.937499
323	-2.31531	0.270589
325	0.609216	-0.893875
326	0.368371	-0.607695
332	-3.00297	0.112009
335	-1.82004	-0.78634
342	-2.05537	-0.587314
356	2.13715	-2.96431
379	-5.33129	1.10673
453	-1.43267	-0.0808019
454	-0.0957831	-2.21939
460	-2.88923	-0.448025
527	-1.19818	-3.47061
594	-5.71921	0.966185
602	-6.11807	0.607886
611	-10.7086	4.62166
612	-6.6392	0.449494
614	-4.95906	1.69189
650	-1.32682	-2.53916
660	-1.40472	0.478559
700	-1.15224	-3.64963
702	-1.34287	-3.91573
712	-2.16563	-4.88082
723	-10.7152	2.53501
738	-7.27908	2.68611
880	-2.94208	-2.39707
887	-2.01028	-4.73819
985	-4.34512	2.03293
993	-1.73467	-0.774344
994	-4.66306	3.4898
996	-2.39423	-1.05797
998	-0.0148795	-0.749101
1182	-5.02479	1.25082
2214	-2.25824	1.1286
2537	2.7064	0.055621
3327	1.54143	-0.0254363
3776	-0.287702	-3.48228
3893	-4.72319	1.25219
3931	-3.48544	3.08849
4133	-4.16625	1.0509
4458	0.735532	-0.959409
4840	-0.57954	3.75201
5054	-4.46707	0.32168
5144	-0.67217	-0.546645
5541	-3.96825	1.81763
5634	-5.04835	0.854844
5779	-1.18372	-0.674164
5780	-1.68758	-0.299839
5950	-6.11807	0.607886
5951	-6.24965	0.799243
5960	-10.6251	3.79447
6027	-1.1683	-0.523573
6276	-0.479281	-3.26327
6324	1.48356	-4.87743
6949	4.23589	0.878659
6981	-5.15648	1.75533
7007	-2.15539	4.87266
7037	1.11913	1.0919
7092	-2.08984	1.00098
7095	2.74672	-0.204106
7193	-0.49752	1.13354
7336	0.403117	1.38888
7344	-2.80236	-0.737636
7361	-2.15389	-3.27275
7410	-0.185543	-1.08403
7500	2.02501	-1.83803
7584	0.794548	0.151193
7585	0.841408	0.287431
7632	1.3348	0.38486
7652	0.203794	3.44389
7655	0.472809	1.95151
7661	-0.765044	0.726956
7703	-0.0406464	-1.43019
7704	-1.70469	-0.424816
7742	-1.86421	-0.592561
7771	-1.73025	-0.376593
7775	-0.562367	-0.856777
7785	-0.948005	0.426983
7795	-0.506338	-0.71631
7797	-1.46484	-1.23008
7800	-1.05449	-0.630109
7820	-3.23414	-0.915556
7822	0.630447	-1.77614
7847	-2.48092	-3.74278
7870	-0.0963376	-1.2952
7888	0.628563	-0.861232
7915	-1.98073	-1.8608
7943	-4.09074	-0.739809
7961	-0.397787	-2.75341
7991	-6.04005	0.260215
7997	-2.4049	-1.8496
8027	0.162054	-4.37988
8051	-0.250451	-2.30248
8063	-0.86542	-3.13413
8093	-0.0451163	-2.13464
8094	-5.68705	0.671124
8103	-0.365249	-3.06285
8114	0.244704	-3.5053
8118	1.11009	-3.04936
8129	0.0349356	-2.61368
8130	-0.482197	-2.62985
8141	2.16697	-2.96845
8146	-1.59313	-2.95721
8158	-5.16816	1.20519
8169	-2.19581	-1.32744
8187	0.220661	-1.96711
8193	0.994618	-2.37206
8283	3.35717	1.88346
8364	-3.37424	2.71621
8365	-3.71705	1.36571
8405	0.615063	-2.85121
8467	-2.35866	0.763638
8468	-5.65266	3.10051
8791	-0.534148	2.23431
8792	1.01611	2.7864
8815	0.181845	-0.930524
8843	0.541983	-0.494517
9018	3.4559	0.845104
9473	-1.70152	0.717457
9589	-0.229955	-2.67907
10106	2.51115	-0.732132
10882	-1.72721	-1.81675
10895	-1.27276	-1.08976
10993	-0.248557	-2.7053
11529	-1.73267	-1.62111
11614	-2.83572	-2.10122
11732	0.116244	-2.69085
12020	-0.832873	-2.89757
12041	-3.5761	-0.764991
12053	0.328516	-0.435582
12180	-2.27109	-1.96994
12181	-2.7758	-1.86588
12191	-2.06564	-1.63652
12232	0.606936	-2.95825
12265	0.21012	-3.40451
12266	-0.173617	-3.28319
12566	2.70577	0.201942
12571	-1.10728	-1.10561
12580	-1.47401	0.507737
12658	1.50809	-2.21503
12741	0.359529	-1.79001
12756	-1.89181	-0.866212
13561	1.23183	-1.83368
14296	0.932568	-3.91515
14514	-1.32333	-2.01819
14525	3.11165	0.547988
15613	-0.9426	-0.768335
15654	-0.305927	-2.3701
15717	-0.937507	0.712806
16237	-0.742598	0.448325
16330	-3.74988	1.98131
16331	-1.72214	-0.987019
16441	0.747693	-0.971373
16507	-0.841919	-0.43641
16537	-0.189331	0.119383
16590	0.375036	-2.8548
16592	0.18905	-3.14903
16617	0.0675789	-0.73496
16666	2.30709	-0.582777
16778	0.10461	-1.69857
16800	0.922841	-2.32616
17008	-1.49192	-0.95485
17090	2.13084	-1.72151
17100	1.7105	-0.291152
17129	0.171127	-0.0789364
17356	2.87585	-2.07676
17685	1.36454	2.29298
17816	-0.937356	-0.090637
18522	0.17378	-1.73843
19602	-0.0374108	-2.57875
19802	0.566729	1.90343
20083	0.260145	-1.90482
20210	-6.39384	1.06293
20219	-1.5785	-0.994139
20487	-0.159515	0.405455
20748	-0.368841	-0.159422
20861	-0.0162125	-0.515328
21596	-0.592007	-1.20058
21625	-2.11448	-1.58091
21768	0.030903	-0.786612
22201	0.26998	-4.66286
22386	-0.327644	-2.80001
22629	-3.76707	2.43937
23173	0.852102	1.42158
23203	-0.967168	-1.75186
23234	-0.72631	-2.40171
23347	2.74354	1.36857
23535	-0.116017	3.1997
23616	0.960178	1.40679
23716	0.612441	-2.60666
24020	-1.24805	-1.46343
24114	-2.05163	0.902967
24117	-2.04351	0.470583
24118	-0.342197	1.90661
5283356	3.12193	2.796
5364941	2.64994	1.69689
5367531	2.37154	2.32244
5283335	2.11281	1.51979
5364942	3.12957	2.4528
5318599	2.12108	0.971539
5317045	2.00229	1.05144
5364448	3.95895	0.228384
5363233	2.54018	1.79611
5283339	1.3028	0.837538
5283345	2.60151	2.38299
5312586	-3.32491	4.20947
854	-2.21187	-0.471056
857	-5.03122	1.54723
875	-10.7451	4.10861
965	-3.37222	2.17324
1030	-1.56735	-2.82263
1130	0.332284	-0.920319
2345	0.0142442	3.08724
2682	1.40015	-1.64785
4943	0.499345	1.20972
5971	-2.96504	-1.88731
6022	-3.95853	6.28448
6050	-1.82814	4.12079
6057	-6.29147	5.05853
6374	20.0874	22.2277
6482	2.72221	4.04334
6506	-3.62108	4.44669
6532	0.374631	1.60824
6533	0.199811	3.11542
6548	1.28928	-0.631954
6561	-0.329234	-2.76514
6609	1.91556	0.952166
6612	2.01505	1.35557
6631	0.713979	0.766156
6652	1.76395	0.0437844
6656	-6.27467	0.291896
6753	-1.294	4.88541
6835	1.59471	1.67035
6873	-3.25789	2.35337
6874	-3.08624	2.67269
6877	-1.54295	0.162876
6881	-0.261767	3.71463
6887	3.806	1.40861
6915	-4.77005	0.746724
6930	3.64315	3.52997
6943	-1.18904	0.11316
6985	0.452325	-0.869702
6998	-3.15684	-0.40318
7002	2.09785	-0.627501
7016	2.46684	0.113781
7041	-3.13447	-0.283464
7047	0.662605	-2.34787
7122	0.583278	0.436553
7128	-0.281733	-0.716668
7129	1.08917	0.163929
7136	-1.46169	2.12087
7137	-1.57513	1.98285
7147	0.651134	-0.178875
7148	0.240875	-0.852714
7151	-2.06589	-1.99336
7184	-3.77233	2.10897
7194	0.416027	3.67162
7197	-0.339481	-0.724339
7222	0.102247	-2.0961
7249	-1.81957	-0.486102
7267	-1.53937	-0.407772
7338	-2.18565	0.946478
7342	-1.30714	-1.33154
7351	-0.512195	-0.163754
7353	-1.0493	-0.781982
7359	0.24623	-2.63543
7360	-0.602557	-2.30986
7393	-0.958391	0.80602
7409	0.175332	-0.678883
7413	-4.18749	1.60454
7455	-1.86525	-0.244409
7456	-3.7364	0.797236
7476	-0.309338	-1.14532
7478	-4.40167	0.651609
7501	0.959962	-2.17602
7505	-0.994326	-1.79466
7509	0.620769	-1.65642
7531	1.292	0.465144
7557	0.259663	-0.685864
7580	2.95903	-0.449992
7590	-0.65861	0.267974
7593	2.34894	2.26668
7599	0.0974966	3.70215
7601	0.86584	3.75852
7614	0.190823	-0.900427
7633	0.194796	1.57367
7635	-1.48286	-0.800789
7643	-0.954975	0.193368
7644	-1.7786	0.163801
7646	-0.319276	1.00298
7647	3.41278	0.707233
7649	-1.37534	0.41899
7651	0.191983	1.64853
7657	2.31206	0.517437
7658	0.0337436	1.3313
7659	0.737739	4.31903
7660	-1.35527	0.350081
7662	0.200235	1.50957
7663	-0.187026	1.63904
7664	-0.633524	0.969521
7667	-0.934014	-0.631481
7687	1.23384	-0.616827
7708	-1.76388	-0.376243
7711	-1.29758	0.762026
7712	-1.89197	0.01824
7720	0.419177	-2.36812
7728	0.874261	-2.4279
7733	-0.881875	0.256211
7761	-3.60248	-0.404489
7772	-0.846349	-0.610757
7778	-0.96739	-0.169822
7779	-0.964455	0.163445
7781	0.321884	0.402717
7782	0.0436215	1.09468
7792	1.27518	-1.34008
7793	1.00781	-1.29171
7796	0.716543	1.47362
7887	0.42583	-0.891724
7909	0.149949	-2.04385
7921	-1.62681	-0.339521
7937	0.608891	-3.03555
7938	0.0744659	-4.32446
7945	-0.812595	-0.604513
7957	1.76033	-1.0253
7976	-0.288484	-4.92088
7981	-0.338602	0.135206
7982	0.32544	1.47005
7983	-1.16841	-1.37849
7984	1.03033	1.0903
8013	0.496108	-3.19886
8042	0.110777	0.798629
8049	-1.40263	0.148757
8050	-1.49434	-1.1288
8052	-1.94411	-1.102
8092	-2.80657	-1.15084
8134	-1.73775	-3.10686
8136	-2.02989	-0.717463
8137	-2.62674	-1.14098
8139	-1.31561	-0.777949
8167	-1.47748	-0.897105
8172	-1.15685	-2.55993
8176	-2.04796	-1.13319
8185	0.54324	-2.08864
8194	0.520015	-2.14965
8209	1.16879	-1.86687
8294	-0.820317	-0.026848
8298	2.02121	-0.301044
8347	1.06532	2.33337
8361	-2.65742	4.19108
8369	-3.08529	-0.360283
8375	-2.68418	0.282526
8400	0.938435	2.38159
8419	-0.78058	-0.64718
8432	-0.0475879	0.994541
8439	-0.911349	-0.882701
8469	-1.28784	1.37074
8499	-2.34424	-0.580483
8500	-0.0622633	-0.780837
8615	0.273978	3.93407
8698	-1.16224	0.540598
8710	1.46205	-0.619064
8712	0.473849	-2.2485
8738	-2.77843	-0.560597
8763	-2.76098	2.7831
8767	0.563381	2.78343
8768	-4.80836	1.0827
8784	-5.71522	2.68719
8794	-0.587572	-0.602489
8821	-2.65343	-1.9561
8833	-0.617201	0.0797207
8834	0.398858	0.385408
8835	0.577451	0.623563
8858	-0.361365	-2.06447
8863	0.982505	0.138991
8878	-1.78037	-1.11167
8888	1.56653	0.0255182
8901	-1.83835	-2.81872
9017	-0.716522	-0.0279492
9024	0.22219	1.75188
9027	1.27857	-1.08011
9316	-0.0937051	1.62099
9895	1.81685	-0.534305
10049	-0.249703	-5.43724
10099	5.10743	2.08512
10128	2.64954	-0.0703465
10137	4.76642	2.02387
10261	1.20476	-0.337238
10315	0.513003	-0.766015
10336	-1.12142	-3.02339
10353	2.22706	-0.446488
10402	-4.1036	2.38459
10409	2.97278	0.668404
10460	-1.23874	-2.59065
10560	0.357747	-3.28937
10582	1.61898	-1.50667
10748	-2.29615	0.954605
10795	-1.33175	-3.33046
10819	1.03534	-1.0733
10861	-0.933361	0.927386
10883	-1.81015	-1.3882
10885	-0.834955	-1.00947
10892	-0.349178	-1.80045
10902	0.969371	-3.43222
10931	-6.08168	0.418906
10947	3.33036	0.784409
10954	2.47368	-0.28526
10957	-2.25422	-1.61572
10975	0.653191	-0.48474
11039	-1.69253	-1.44261
11086	-0.307742	-0.745475
11160	-1.16164	-0.591588
11196	-0.132148	-1.95768
11251	-0.0944089	-2.3426
11335	-1.07687	-0.465766
11363	-1.11366	0.162966
11487	1.52829	0.0812515
11505	-0.291165	-1.34522
11514	0.188274	0.717292
11559	-2.76329	-1.33367
11579	-6.25127	0.732815
11962	0.0988487	3.08398
12021	-2.3806	-3.09995
12044	-0.776723	-1.13142
12045	-3.75188	-0.0801533
12072	1.51623	-0.755952
12127	-3.21525	-0.0598375
12170	-2.65775	-1.04641
12174	-1.83876	-1.58938
12177	-0.667329	-2.46979
12278	-1.20074	-0.919363
12293	-1.01961	-1.11644
12327	-0.983161	-0.778093
12506	-1.72914	-0.532202
12529	-2.75981	-1.93472
12613	0.143244	0.0308076
12729	-1.17565	-0.649062
12777	-1.1376	-0.155335
12844	-0.672677	-0.0109397
12993	-1.31154	-2.64232
12999	0.202591	-2.75342
13204	-1.50804	-0.659265
13216	2.25804	-0.566629
13233	2.35052	-3.33248
13357	-1.32259	-1.12255
13436	1.98927	-0.0486957
13577	-0.876146	-2.92599
13663	0.947145	1.50664
14104	1.13196	-0.958345
14228	0.0203926	-0.507638
14234	0.437803	1.33829
14235	-0.358333	0.3397
14295	0.420744	-0.659063
14328	-0.414769	-0.104762
14350	3.1869	2.1703
14475	-4.82858	1.23399
14486	-6.43843	0.778147
14491	1.43941	-2.38583
14493	2.03249	-1.99968
14505	-1.21796	-2.62698
14511	0.216147	-1.48738
14529	0.599833	-0.425066
14919	0.184195	-2.22057
15037	0.445563	-1.29731
15172	-0.28971	-0.615448
15380	1.13609	-2.10229
15394	-0.932463	-2.91175
15406	3.28369	0.627388
15475	-0.497273	-1.80993
15510	1.77634	-1.46229
15574	-1.61278	-0.715459
15606	-1.65083	-1.0951
15834	-1.56049	0.750462
15909	-0.136691	-0.407102
16255	-0.0180439	-0.212932
16582	1.7271	1.09602
16864	0.127826	1.11849
16899	-0.501191	-1.55077
16900	-0.614231	-2.16209
16970	-2.26928	-1.07888
17166	-0.640782	-1.90684
17167	-1.18219	-2.66555
17244	-0.405156	-2.54983
17355	0.656149	-0.382451
17691	-0.266693	-1.53236
17739	-1.90379	0.889123
17898	-0.730934	-4.23411
18458	-5.93272	0.82952
18698	-0.969817	-0.2932
18756	1.5429	-1.90437
18826	0.985724	1.91132
19089	0.942234	-0.544206
19188	-6.21289	2.32452
19223	0.934797	-1.0093
19244	2.55911	-0.0944547
19309	-2.46404	-0.367374
19603	0.408002	-2.3795
19633	1.17213	-0.327071
19801	-0.485871	-1.8045
20508	1.24966	-1.42959
20967	0.0888909	-1.70026
21363	-4.1464	2.06328
22227	1.44375	-0.611294
22303	0.454904	-1.01638
23104	-2.36016	-1.52449
24197	-3.79233	0.649505
24433	-1.42137	0.836279
24513	-0.259922	-2.04771
24516	-0.42806	-0.89602
24578	-0.273866	1.04659
24583	0.38742	-1.52192
24680	1.7527	1.03188
24834	-0.598664	-1.0532
24835	-2.15044	1.39229
24838	-0.562073	-0.849503
25185	0.875384	-0.184918
25238	0.108699	4.45794
25239	-0.237707	1.41487
25324	0.443396	0.898619
25325	0.353768	0.537527
25612	0.365455	-2.15828
25812	-0.905569	-2.21613
26049	3.389	-0.726372
26204	-0.634613	-0.917122
26289	-0.140743	-0.120275
26318	4.15926	1.53938
26808	0.24517	-3.79433
26955	1.92154	1.27523
27457	0.344075	-3.45455
28151	-1.07852	-0.641237
28500	-1.38437	1.11471
28818	1.046	4.46142
28905	1.09482	-2.51222
28930	3.57703	-0.12461
29025	1.24339	-1.18135
29096	0.940451	-0.749611
29381	0.659294	-1.57221
29421	-1.59347	-0.829823
29467	-1.17968	1.21909
30247	-1.04504	0.513151
30248	0.447731	1.38803
30747	-0.136114	-2.14015
30748	-0.397427	-1.51448
30771	-0.472186	-0.205233
31209	0.945175	0.0990555
31210	-0.441747	0.629722
31214	-0.765343	-1.8525
31223	-0.426842	1.54142
31224	0.282605	4.00017
31225	-0.0885937	1.20422
31226	-0.790163	0.442708
31227	1.7677	-0.39395
31231	0.103083	-0.60497
31251	-1.16176	-1.23407
31269	-3.2959	-3.19655
31283	-0.598506	0.221092
31284	-1.06813	-0.12279
31291	0.757825	-1.76545
31404	2.19879	3.89815
31408	1.96104	-1.11435
31954	-1.17926	0.510077
32065	1.02857	-3.07447
32093	-0.251823	-3.0877
32207	0.135088	-1.2476
32809	-0.662997	1.37286
32857	-0.773408	-2.60901
33032	-10.8149	4.83579
33960	-2.01538	0.226133
34134	0.678997	-1.66499
34286	-0.705942	-3.29571
35821	2.51012	1.11177
36081	0.677605	1.23554
36502	-2.20014	-1.30476
36503	-1.03555	-0.381077
36822	1.42844	-3.50759
37065	0.184951	0.698502
37066	0.901141	-1.0747
38415	1.75883	-1.06711
38688	1.37898	-0.585344
38689	-0.277068	0.818317
38866	1.05416	0.0619387
39801	-1.66881	-1.0709
40631	-0.226196	-1.27009
40749	-1.4513	-0.69151
41270	-1.21348	1.7375
41552	0.0628481	2.04576
41685	0.234457	1.50463
41742	0.9343	-0.821669
42674	3.2916	2.7698
42745	0.203649	0.464631
43045	0.417429	2.32198
43046	-0.158134	1.60419
43851	-0.708999	0.0767595
47167	2.859	2.61825
47616	-0.898705	1.68483
47922	1.18534	-0.0652119
49988	0.716239	0.718876
49993	-0.870095	-0.301653
50024	0.209012	1.05935
50090	0.710546	1.35491
50212	0.331604	5.08553
50216	-3.42595	2.97341
50941	1.49936	-1.84537
51330	0.0195749	0.909875
60968	2.89096	4.33264
60979	-1.74797	-0.0370468
60980	0.0363226	2.88432
60983	-1.70257	-1.57026
60985	1.09763	1.33893
60990	0.337125	-0.790582
60995	0.140174	-0.761504
60999	0.70393	3.46174
61000	0.364259	3.37793
61005	-0.533005	1.64454
61006	0.247502	-0.903385
61007	0.488673	-0.298461
61008	-0.00706012	-0.500657
61010	-1.12495	-0.0416304
61014	-0.959385	2.8499
61015	-0.500971	-0.254952
61020	-1.24773	-2.93802
61027	-0.594091	-0.310968
61030	-0.813328	-0.875102
61031	1.129	-1.29197
61035	-1.51435	-0.50409
61045	1.13751	-1.99981
61046	1.42723	2.4729
61047	0.0946552	4.41805
61048	-0.732445	0.796975
61051	0.481056	3.74476
61052	-0.308401	0.745691
61060	-0.249703	-5.43724
61061	-0.424407	-0.829073
61085	0.587636	1.23382
61092	-1.0845	-0.366775
61093	0.395349	0.487341
61098	-0.308711	0.448172
61124	2.12529	-0.280117
61130	1.51497	-0.910788
61135	-1.37639	-0.655438
61137	-0.732467	-1.24435
61151	-1.73927	0.564299
61166	-2.36019	-1.19239
61167	-2.50761	-1.29037
61171	-1.79292	-2.31246
61177	-2.54043	-1.76967
61183	-0.987191	-0.549621
61184	-1.3686	-1.64905
61185	-0.234619	-0.77281
61192	-1.65916	-0.235503
61197	-3.03274	-1.35709
61202	1.2805	0.0141992
61204	-0.73822	-0.334186
61229	-1.97789	1.79271
61240	-0.774613	-2.78742
61252	0.881893	-0.873007
61262	-0.0372668	1.0608
61275	0.929195	-1.08575
61293	-2.02667	-0.814006
61296	-1.77216	-0.0947257
61312	-1.44663	-1.02857
61313	-2.21265	-0.797816
61319	-2.06128	-1.71553
61325	-0.667538	-1.25236
61359	0.911407	-0.388739
61361	-0.888662	1.61899
61362	1.65581	-0.79503
61370	-0.687621	-3.03274
61375	-0.302409	-0.37308
61384	0.705028	2.56118
61386	0.0554115	0.318375
61401	0.745266	-0.840838
61403	1.51971	0.911153
61408	-1.08731	-0.822939
61409	-2.01735	-1.09094
61410	-1.53248	-0.868919
61417	-0.841628	0.653003
61448	-1.51198	-0.63318
61451	-2.02118	-1.20846
61453	-0.604778	-2.17393
61455	-0.0827358	0.12055
61466	-0.0812951	-0.0346854
61467	-0.149871	-0.0298278
61516	1.18362	0.0471973
61522	-0.109698	-1.35699
61531	1.02761	-0.387487
61585	3.33665	3.5749
61592	-1.79533	-1.45221
61631	-2.01406	-0.974938
61633	-0.255363	-0.659605
61641	-2.06554	-1.51726
61657	-0.460154	-2.7231
61658	-1.20409	0.105052
61660	-2.03346	-1.31457
61662	-2.04978	-1.09338
61663	-1.15985	-1.97215
61664	1.30477	-0.679146
61670	0.41356	-3.13595
61738	-0.980795	-1.90467
61743	-5.25386	1.17229
61808	0.738078	-2.28557
61812	-0.802165	-0.821871
61814	-0.221873	-1.09339
61832	1.33908	-2.33347
61839	-0.846734	-0.69291
61874	-1.14695	-2.05112
61875	0.0740859	-1.81432
61895	-0.214711	-0.411719
61896	-0.326194	-2.22627
61897	-0.725246	-2.09141
61918	-0.132859	-2.99154
61922	-0.686629	-2.41292
61950	0.637333	-1.98026
61954	-0.0623208	1.19951
61955	-2.51397	-0.975548
61967	-0.618995	1.25985
61984	-3.00345	-0.643612
61985	-2.34602	0.174305
61995	-1.48646	-1.81216
62003	-4.37544	1.8692
62024	-1.28378	-1.17548
62087	-0.367388	-2.46738
62089	-4.57737	1.57195
62098	-0.424381	0.127186
62131	0.219926	-2.36041
62143	-1.87117	-1.29269
62144	-2.70309	-0.864593
62231	0.469853	-2.02545
62240	1.02521	1.48068
62321	-0.230317	0.204955
62328	1.1299	1.48993
62329	-0.771952	5.85407
62332	-1.98025	5.34782
62333	-4.18166	1.47952
62334	0.881507	1.40381
62337	0.82952	1.22216
62341	-0.621148	0.550159
62345	0.816999	-2.16689
62368	-1.41092	1.31189
62375	-0.408831	-1.13365
62387	1.12106	1.78696
62388	-0.107249	1.97847
62445	0.229193	0.307868
62447	-0.2438	-1.69646
62453	-2.39831	-0.188885
62510	-0.0338542	-2.85744
62553	-0.345463	0.784483
62575	-0.137269	-0.0955511
62583	-0.446236	0.0895218
62588	-1.35612	-0.819294
62624	-3.6515	2.94291
62653	0.010414	-1.63151
62660	-0.196338	1.72973
62752	-2.34055	-0.0411334
62835	-3.89823	0.738855
62900	-1.36486	-0.576138
62901	-2.80328	0.0107129
64685	2.82615	0.226555
64807	1.0134	5.37572
64832	1.53763	0.0686189
65287	-0.166071	1.96278
65413	-0.167177	-2.34752
65575	4.28378	3.06872
66761	1.08522	-1.35054
66768	0.671378	-1.06849
66929	0.222209	-1.83874
67005	0.279137	5.50818
67179	0.161812	-0.9929
67350	1.18852	4.36033
68133	0.591998	-1.00248
68252	-0.284723	1.43756
69091	-2.57001	4.55421
71098	-6.2638	5.04859
71563	-5.02489	1.2515
71590	-0.54099	-2.37914
73114	3.81882	4.38086
74008	-2.93348	-0.629794
74408	1.20072	2.4726
74667	-0.657836	-0.266585
75033	-1.10973	-0.72999
75187	-1.04816	-0.031684
76551	-5.30486	0.981548
78954	0.631527	-0.286716
79064	-5.41378	7.58358
80395	-4.30966	1.37488
80790	1.18349	-0.683904
81769	-1.74242	-0.307514
82229	3.11131	0.547478
82661	-0.543852	-0.197151
83268	1.13731	-0.960183
84398	2.63367	-0.398843
85703	-0.610366	0.788346
86015	-1.16879	-0.434686
86579	2.25578	4.14386
86592	-1.11234	-1.74672
86651	-1.66269	-1.18425
86799	-0.769002	0.634576
87166	-1.20765	-2.2634
87582	-1.21336	-2.35822
88454	-1.39423	-1.01551
89306	1.57591	2.43521
89385	0.156361	0.103807
89479	2.1928	3.42292
90592	0.296909	1.30141
90787	0.198106	-1.67827
90978	4.30276	2.49999
90984	3.07611	-0.577084
91147	1.7958	-1.26444
91696	3.29891	2.61853
91697	0.924819	-0.0709271
91978	2.14245	0.354865
92573	-0.488899	-0.72216
92739	0.0664292	-1.97664
92831	-2.80236	-0.737636
92862	2.30402	1.39469
92874	1.20845	-1.31929
93366	-0.106916	-1.9306
93375	1.07359	-0.530542
93832	-0.466866	0.0516264
93838	1.77974	3.52186
94060	0.534343	-1.23854
94111	2.0291	0.354244
94206	-5.45755	0.95104
94349	-0.529554	0.745901
94373	1.21165	0.087462
94453	2.91766	0.698382
94569	1.59802	-0.790452
94579	0.108009	0.998869
95266	2.49848	2.15967
95330	2.88995	0.183411
95414	-0.233377	-0.477575
95978	-0.295277	0.0193818
100990	-0.800493	1.09722
101010	1.02326	-1.4866
101549	2.33054	0.650408
101555	0.593941	4.85089
101604	0.422579	0.928224
101696	1.98139	0.740702
101976	1.21034	0.166892
102024	-0.137541	1.0831
102120	1.9646	4.40955
102567	1.97932	4.08564
102604	1.83452	-0.591342
102816	1.2869	-1.98925
102861	-0.162694	2.022
103378	0.299534	-0.915153
103379	-3.20952	2.91719
103381	2.85867	0.810818
103607	0.688434	1.75401
103826	-0.301626	-0.156493
104721	-0.351628	-2.74834
105050	3.30523	-0.896621
105179	0.405704	-0.833077
105516	1.09381	3.09569
105595	0.750581	2.23345
105653	0.0105118	4.58534
105755	1.18075	3.03938
105764	-1.0618	-0.86676
106673	3.94889	2.272
106827	1.63737	0.506301
107065	3.85202	3.31665
107217	1.38223	1.85414
108244	0.0895498	-2.0567
108343	-1.83114	-1.32825
108504	0.547676	-1.36841
108506	-0.0864384	-0.391111
108507	0.506781	-1.33806
108515	-1.73496	2.21514
109114	-0.850703	-0.31911
109116	-0.374665	-0.158425
109387	2.63724	1.33312
109420	2.87436	1.15677
109455	-1.95738	2.30777
109457	-1.55972	2.64349
110655	2.0254	4.06435
110747	0.927888	-1.15655
111352	0.498636	1.48416
112122	0.853184	0.802822
112446	0.790309	-0.395672
112721	-0.530159	1.72879
114454	1.37392	-0.801681
114506	4.6899	2.70535
117549	1.08677	-0.498724
118134	2.87671	0.977214
118181	1.06889	-1.11402
118292	2.21244	1.18998
119831	3.62317	2.98668
121646	3.41894	2.88099
121790	-1.30573	0.635733
122941	-0.660996	-3.82985
125468	-6.27467	0.291896
135191	-1.09683	-0.649163
140244	-0.154478	-1.04441
142266	-1.42529	1.44479
145386	3.52327	1.47635
155361	2.4077	1.2632
155708	-1.1497	2.30881
158410	1.78287	3.47524
158411	-0.136817	0.65068
160065	0.430507	1.89655
160707	1.43607	-0.516388
161949	2.56262	-0.201581
161993	2.13178	0.663015
162002	2.5709	3.64605
162027	1.05962	-0.185581
162030	1.74055	1.15341
162053	1.53945	-0.870295
162061	1.7733	0.0996542
162213	3.27428	1.79292
162479	-0.225307	0.0556326
163263	3.81882	4.38086
166257	-0.494466	-0.0307933
169110	-0.854761	0.0417686
170398	0.988956	-1.04159
216442	-0.350015	4.28388
219672	1.52765	0.241328
220050	0.126805	-5.32498
221641	-0.522977	0.318849
221691	-0.453002	1.34767
225936	-0.80137	-2.60401
226486	-2.87309	1.14915
228769	-0.339058	-0.184144
228987	2.22109	1.38667
229377	-0.931081	-1.15231
229385	-1.01233	-0.657372
229888	0.435229	2.59357
235414	0.548951	0.0125033
240119	0.325381	1.40118
240121	2.75749	4.00783
243675	-0.7982	1.17463
243783	0.0476627	-0.386366
247573	-1.24855	-2.57931
249494	0.88041	-0.869888
249573	-0.103512	-2.06664
251529	0.392527	2.97371
251531	-1.09365	2.69365
266588	-1.97995	0.968941
278476	-0.105784	2.10838
285097	-0.456022	0.808399
287439	1.175	1.1503
289151	5.6376	3.35032
316771	-0.102779	3.32574
329983	0.941681	-2.17824
439263	2.30391	-0.503483
439314	-1.36081	-2.09442
439569	2.86532	0.0927557
439846	-1.68288	-2.9083
440968	2.96836	-1.51562
441481	-0.869162	-0.379109
441574	-1.4631	-0.357897
441644	-1.20944	-0.319573
442348	5.10743	2.08512
442460	1.13702	2.21233
442461	3.389	-0.726372
442474	-0.768028	-0.0288463
442478	0.945153	-2.17584
442482	2.60526	-1.109
443162	1.71455	-0.297637
444090	0.357747	-3.28937
444305	-11.0895	3.99432
444972	-11.1582	3.45632
445639	-3.0548	2.97718
447661	0.596612	-0.458132
457869	-1.47909	2.92907
494311	0.111806	0.996515
517827	1.6283	0.604115
518472	1.12348	1.81354
518937	-0.259954	-2.52788
519409	-1.35149	-0.974291
519539	0.805601	-2.81411
519709	-2.04435	-1.11048
519793	-0.438615	-2.84693
519845	-2.57564	-0.732486
519890	-1.36766	-0.876561
519915	2.00484	0.900298
520098	0.237168	-3.14383
520148	0.63206	1.94304
520296	-0.538046	0.371803
521185	4.2113	1.88297
521207	4.91105	1.66984
521238	-1.16251	-0.779383
521300	-1.97748	-2.79163
521332	3.81882	4.38086
522214	-0.327223	-0.6253
522667	4.20355	2.82203
522673	1.58583	2.13724
522676	0.00498419	-0.143162
524504	1.66801	-0.622929
533700	-1.40426	-0.375246
537682	-2.51061	0.288412
538506	-1.33812	0.073128
539829	-1.39676	2.58036
540124	0.646563	0.399627
543323	1.07911	-1.47352
544155	-0.972051	-1.18401
548353	0.70671	-2.8547
549519	-5.64987	0.660667
556940	-1.96987	-1.2934
557222	-2.56087	-0.651978
560879	0.685527	-0.496456
565690	2.2093	2.62319
570574	0.216047	1.21566
576026	0.901415	0.872061
576240	0.864501	2.29861
576263	0.372002	1.64202
582291	-0.230793	2.21176
595928	0.585169	-0.129522
605629	-0.234782	1.56362
636475	1.61898	-1.50667
637516	0.175332	-0.678883
637517	-3.37222	2.17324
637522	0.740199	-1.70408
637528	-0.610925	-2.29356
637756	0.1458	-0.293018
637796	-0.911349	-0.882701
638024	-0.582129	3.75193
638099	0.116244	-2.69085
638139	-3.13842	1.36742
640199	0.655125	-0.173573
642231	-5.34266	0.885948
642771	-1.50804	-0.659265
853433	-2.183	0.948979
969516	-3.07115	7.08563
1083514	-2.455	7.00072
1339314	-2.08852	7.92376
1549026	-0.64336	0.210427
1550470	-2.2711	-1.08009
1712058	0.706129	0.707998
1713001	1.29028	-0.548966
2733294	-2.16652	-0.965952
2867012	-0.264517	6.1942
3018907	0.00355719	0.358022
3032853	4.46464	0.456312
3033030	0.605354	-0.858785
3033452	2.31756	2.52036
3033845	-0.770934	-1.92431
3033866	3.81366	0.231263
3034424	-1.64685	-3.29639
5270709	0.149472	3.43779
5270723	-7.49195	10.0266
5271566	-3.34753	0.787201
5280435	3.4559	0.845104
5280509	0.56978	-4.1513
5280511	0.681035	0.0817336
5280755	-3.75188	-0.0801533
5281162	-1.06685	-0.221034
5281521	1.66952	0.423161
5281525	1.70915	0.428511
5281553	1.53994	-1.90608
5281929	-0.547348	1.23374
5282109	-0.964455	0.163445
5282110	-1.3538	0.353069
5284369	-0.261508	3.7162
5284656	-0.620736	1.00906
5288845	-0.0963376	-1.2952
5311408	-1.90198	8.06917
5323920	-0.0200487	1.58259
5324052	-6.384	3.37904
15620	0.514752	-3.00269
8438	-0.957877	-1.28271
534653	0.52289	2.41903
11509	1.72899	-0.654815
6568	0.971142	-1.4535
82227	3.90188	-0.447304
5355856	0.716543	1.47362
263626	0.168539	-1.32439
95492	-7.02291	3.42246

## Sheet: Screening Panel PC Values
CID	PC1	PC2
126	-2.72847	-0.336683
356	2.13715	-2.96431
379	-5.33129	1.10673
385	-7.97072	5.00835
650	-1.32682	-2.53916
931	2.25611	-3.56547
1045	2.08864	-1.76129
1049	1.56667	-4.45123
1136	0.861896	-1.19309
1140	2.49004	-2.59176
1146	0.97452	-2.7232
6374	20.0874	22.2277
6544	1.61351	-1.22348
6669	0.0667728	0.215375
7127	0.208836	-1.78276
7165	-0.434521	-0.55518
7600	1.55453	2.28698
7632	1.3348	0.38486
7820	-3.23414	-0.915556
7824	0.082244	1.00076
7961	-0.397787	-2.75341
8030	2.15839	-1.94627
8048	2.62912	4.15445
8078	4.77812	-1.4638
8438	-0.957877	-1.28271
8452	2.10048	-0.96399
9016	0.95232	-2.37771
9256	1.47354	-2.51548
9261	1.2679	-5.87511
10285	0.948922	-4.35848
10430	-4.41874	1.14589
11527	2.73495	1.08719
12813	1.50258	3.00161
13420	3.3799	-0.553126
15620	0.514752	-3.00269
16368	-5.63435	4.3932
18467	-0.0807485	-4.57488
20210	-6.39384	1.06293
27867	2.3799	2.22702
31277	-10.7612	4.36819
32594	1.14001	-3.1349
61199	-2.50117	1.26366
62105	1.68513	-1.77419
62241	4.33413	0.570253
73918	3.89702	1.20705
89440	3.20905	-0.408047
91497	3.98535	1.50806
95492	-7.02291	3.42246
101977	3.01284	1.46088
227085	-1.53756	-2.89062
230920	2.33692	-2.26153
263626	0.168539	-1.32439
443156	2.87314	-2.84769
534653	0.52289	2.41903
637511	0.0352496	-1.41564
1550884	2.3206	1.07123
5280450	0.0668229	9.01385
5281515	3.98597	-1.75852
5325830	2.85152	-0.00130465
5355856	0.716543	1.47362

## Sheet: MOR256-17 Activator PC Values
CID	PC1	PC2
1140	2.49004	-2.59176
6374	20.0874	22.2277
6544	1.61351	-1.22348
7824	0.082244	1.00076
7961	-0.397787	-2.75341
8438	-0.957877	-1.28271
11527	2.73495	1.08719
15620	0.514752	-3.00269
32594	1.14001	-3.1349
637511	0.0352496	-1.41564

## Sheet: MOR256-22 Activator PC Values
CID	PC1	PC2
7632	1.3348	0.38486
637511	0.0352496	-1.41564
